# Supplementary material for: Development and validation of a trans-ancestry polygenic risk score for type 2 diabetes in diverse populations
Source: Genome Med. 2022 Jun 29;14:70. doi: 10.1186/s13073-022-01074-2 (PMC9241245; doi:10.1186/s13073-022-01074-2)
Supplement: Supplementary file 2 — Additional File 2: Supplementary Tables S1-S7. [file 13073_2022_1074_MOESM2_ESM.xlsx]

## Sheet: INDEX
Table S1: The number of type 2 diabetes cases and controls in each eMERGE site by population.
Table S2: Validation of type 2 diabetes phenotyping algorithms in gold standard chart review datasets from Mass General Brigham (MGB) and University of Alabama at Birmingham (UAB).
Table S3: Performance metrics of the trans-ancestry PRS constructed by PRS-CSx and three alternative PRS in the eMERGE dataset.
Table S4: Performance metrics of the trans-ancestry PRS constructed by PRS-CSx in the four Black cohorts.
Table S5: Performance metrics of the trans-ancestry PRS constructed by PRS-CSx in the Taiwan Biobank.
Table S6: Meta-analysis of the performance metrics of the trans-ancestry PRS constructed by PRS-CSx for the European, African and East Asian populations.
Table S7: Tail discrimination of the trans-ancestry PRS constructed by PRS-CSx after ancestry adjustment.

## Sheet: Table S1
		CCHMC	CHOP	Columbia	MGB	Mayo	Mt Sinai	NU	VUMC	Total
European	Case	62	34	67	2719	1649	132	307	3419	8389
	Control	4536	4471	338	20319	4941	416	1727	9656	46404
	Total	4598	4505	405	23038	6590	548	2034	13075	54793
African	Case	6	47	29	372	5	1151	113	965	2688
	Control	499	4089	73	849	7	2091	148	2028	9784
	Total	505	4136	102	1221	12	3242	261	2993	12472
Hispanic/Latino	Case	-	3	46	300	5	480	14	20	868
	Control	-	208	114	875	10	249	3	47	1506
	Total	-	211	160	1175	15	729	17	67	2374
East Asian	Case	-	1	8	31	1	-	-	10	51
	Control	-	95	18	365	6	-	-	22	506
	Total	-	96	26	396	7	-	-	32	557

## Sheet: Table S2
Algorithm	Performance Metrics	Validation Dataset
		MGB	UAB
eMERGE	Sensitivity	0.72	0.73
	Specificity	0.64	0
	PPV	0.8	0.91
	NPV	0.53	0
Modified eMERGE	Sensitivity	0.92	0.9
	Specificity	0.51	0
	PPV	0.79	0.92
	NPV	0.77	0
Modified MGB	Sensitivity	0.61	0.81
	Specificity	0.87	0.36
	PPV	0.9	0.94
	NPV	0.53	0.13

## Sheet: Table S3
Method	Population	Population Prevalence	Liability R2	AUC				OR per SD (95% CI)	Top 2% PRS						Top 5% PRS						Top 10% PRS
				Covariates only	PRS only	Covariate-adjusted PRS	Covariates + PRS		OR (95% CI)	P-value	Sensitivity	Specificity	Adjusted PPV	Adjusted NPV	OR (95% CI)	P-value	Sensitivity	Specificity	Adjusted PPV	Adjusted NPV	OR (95% CI)	P-value	Sensitivity	Specificity	Adjusted PPV	Adjusted NPV
PRS-CSx	European	0.1	0.092	0.744	0.657	0.66	0.793	1.960 (1.908, 2.015)	4.207 (3.656, 4.841)	1.815e-89	0.048	0.985	0.264	0.903	3.553 (3.239, 3.898)	1.875e-158	0.108	0.96	0.232	0.906	3.187 (2.972, 3.418)	1.328e-232	0.196	0.917	0.208	0.911
	African	0.125	0.028	0.837	0.576	0.577	0.848	1.543 (1.455, 1.637)	1.978 (1.426, 2.743)	4.335e-05	0.031	0.983	0.209	0.877	1.762 (1.422, 2.182)	2.188e-07	0.071	0.956	0.188	0.878	1.632 (1.392, 1.915)	1.757e-09	0.134	0.909	0.174	0.88
	Hispanic/Latino	0.131	0.08	0.824	0.636	0.626	0.851	2.076 (1.838, 2.345)	6.869 (3.114, 15.154)	1.809e-06	0.04	0.992	0.433	0.873	3.821 (2.367, 6.170)	4.158e-08	0.083	0.969	0.286	0.875	2.925 (2.071, 4.132)	1.1e-09	0.153	0.931	0.251	0.879
PRS-CS EUR	European	0.1	0.093	0.744	0.654	0.661	0.794	1.994 (1.940, 2.050)	3.972 (3.447, 4.578)	7.3778e-81	0.046	0.985	0.249	0.903	3.789 (3.452, 4.160)	2.132e-172	0.109	0.961	0.235	0.907	3.232 (3.012, 3.469)	2.287e-232	0.192	0.917	0.203	0.911
	African	0.125	0.019	0.837	0.545	0.563	0.845	1.509 (1.410, 1.615)	1.655 (1.193, 2.296)	0.002585	0.03	0.983	0.198	0.876	1.565 (1.260, 1.944)	5.236e-05	0.07	0.956	0.184	0.878	1.324 (1.122, 1.562)	0.0008917	0.124	0.907	0.16	0.879
	Hispanic/Latino	0.131	0.052	0.824	0.579	0.601	0.843	1.959 (1.712, 2.240)	3.430 (1.676, 7.022)	0.0007447	0.031	0.987	0.261	0.871	2.686 (1.681, 4.292)	3.594e-05	0.069	0.961	0.21	0.873	2.332 (1.647, 3.303)	1.834e-06	0.135	0.92	0.203	0.876
PRS-CS Meta	European	0.1	0.101	0.744	0.662	0.667	0.798	2.054 (1.998, 2.112)	4.795 (4.164, 5.521)	3.715e-105	0.05	0.985	0.276	0.903	3.842 (3.501, 4.216)	4.796e-177	0.11	0.961	0.237	0.907	3.530 (3.292, 3.785)	1.806e-274	0.203	0.919	0.217	0.912
	African	0.125	0.025	0.837	0.565	0.573	0.847	1.507 (1.421, 1.599)	1.663 (1.188, 2.328)	0.003072	0.028	0.982	0.18	0.876	1.613 (1.298, 2.005)	1.636e-05	0.069	0.955	0.179	0.878	1.584 (1.347, 1.863)	2.807e-08	0.128	0.908	0.165	0.879
	Hispanic/Latino	0.131	0.077	0.824	0.633	0.625	0.85	2.058 (1.822, 2.324)	4.609 (2.180, 9.745)	6.331e-05	0.038	0.991	0.381	0.872	3.457 (2.177, 5.491)	1.477e-07	0.084	0.97	0.293	0.875	2.933 (2.078, 4.139)	9.186e-10	0.153	0.931	0.251	0.879
LDpred2 Meta	European	0.1	0.072	0.744	0.637	0.641	0.784	1.819 (1.770, 1.868)	3.815 (3.309, 4.398)	5.785e-76	0.045	0.985	0.243	0.903	3.275 (2.980, 3.599)	4.531e-134	0.1	0.959	0.214	0.906	2.975 (2.772, 3.193)	7.195e-201	0.186	0.916	0.196	0.91
	African	0.125	0.019	0.837	0.559	0.565	0.844	1.440 (1.356, 1.529)	1.676 (1.195, 2.351)	0.002761	0.027	0.982	0.177	0.876	1.376 (1.106, 1.712)	0.004193	0.064	0.954	0.164	0.877	1.451 (1.234, 1.707)	6.642e-06	0.126	0.907	0.163	0.879
	Hispanic/Latino	0.131	0.036	0.824	0.597	0.584	0.838	1.671 (1.482, 1.885)	2.305 (1.153, 4.609)	0.0182	0.029	0.985	0.229	0.871	2.048 (1.293, 3.244)	0.002242	0.07	0.962	0.216	0.873	1.646 (1.166, 2.324)	0.004607	0.129	0.917	0.19	0.875

## Sheet: Table S4
Cohort	Population Prevalence	Liability R2	AUC				OR per SD (95% CI)	Top 2% PRS						Top 5% PRS						Top 10% PRS
			Covariates only	PRS only	Covariate-adjusted PRS	Covariates + PRS		OR (95% CI)	P-value	Sensitivity	Specificity	Adjusted PPV	Adjusted NPV	OR (95% CI)	P-value	Sensitivity	Specificity	Adjusted PPV	Adjusted NPV	OR (95% CI)	P-value	Sensitivity	Specificity	Adjusted PPV	Adjusted NPV
REGARDS	0.125	0.046	0.571	0.598	0.606	0.631	1.700 (1.575, 1.835)	3.044 (2.148, 4.313)	3.867e-10	0.04	0.987	0.298	0.878	2.432 (1.934, 3.059)	2.952e-14	0.087	0.962	0.246	0.881	1.912 (1.607, 2.275)	2.708e-13	0.15	0.916	0.203	0.883
GenHAT	0.125	0.036	0.576	0.6	0.614	0.633	1.853 (1.704, 2.014)	2.700 (1.744, 4.180)	8.438e-06	0.028	0.989	0.261	0.877	2.428 (1.849, 3.187)	1.698e-10	0.067	0.967	0.226	0.879	2.329 (1.917, 2.830)	1.7e-17	0.127	0.928	0.202	0.882
HyperGen	0.125	0.062	0.723	0.609	0.622	0.757	1.754 (1.524, 2.018)	3.365 (1.693, 6.690)	0.0005373	0.045	0.987	0.335	0.879	2.125 (1.336, 3.378)	0.001443	0.105	0.965	0.3	0.883	2.244 (1.578, 3.190)	6.742e-06	0.169	0.919	0.23	0.886
Warfarin	0.125	0.015	0.601	0.582	0.57	0.631	1.365 (1.130, 1.648)	2.700 (0.802, 9.089)	0.1089	0.013	0.975	0.07	0.874	1.863 (0.878, 3.953)	0.1052	0.05	0.952	0.13	0.875	1.576 (0.922, 2.694)	0.09644	0.103	0.904	0.134	0.876

## Sheet: Table S5
Dataset	Population Prevalence	Liability R2	AUC				OR per SD (95% CI)	Top 2% PRS						Top 5% PRS						Top 10% PRS
			Covariates only	PRS only	Covariate-adjusted PRS	Covariates + PRS		OR (95% CI)	P-value	Sensitivity	Specificity	Adjusted PPV	Adjusted NPV	OR (95% CI)	P-value	Sensitivity	Specificity	Adjusted PPV	Adjusted NPV	OR (95% CI)	P-value	Sensitivity	Specificity	Adjusted PPV	Adjusted NPV
Batch 1	0.137	0.151	0.751	0.694	0.697	0.81	2.185 (2.052, 2.327)	4.620 (3.563, 5.990)	7.466e-31	0.066	0.982	0.372	0.869	4.562 (3.830, 5.434)	7.643e-65	0.156	0.956	0.358	0.877	3.809 (3.308, 4.385)	4.067e-77	0.258	0.908	0.309	0.885
Batch 2	0.137	0.129	0.724	0.679	0.682	0.781	2.013 (1.933, 2.097)	4.599 (3.881, 5.449)	1.798e-69	0.068	0.983	0.382	0.869	4.004 (3.558, 4.505)	2.139e-117	0.145	0.955	0.34	0.876	3.372 (3.065, 3.709)	6.222e-138	0.238	0.908	0.291	0.882
Batch 3	0.137	0.153	0.743	0.691	0.696	0.802	2.156 (1.958, 2.375)	4.347 (2.894, 6.529)	1.434e-12	0.064	0.982	0.364	0.869	3.943 (2.972, 5.230)	1.843e-21	0.14	0.955	0.328	0.875	4.519 (3.638, 5.613)	2.347e-42	0.277	0.909	0.327	0.888

## Sheet: Table S6
Population	Population Prevalence	Top 2% PRS						Top 5% PRS						Top 10% PRS
		OR (95% CI)	P-value	Sensitivity	Specificity	Adjusted PPV	Adjusted NPV	OR (95% CI)	P-value	Sensitivity	Specificity	Adjusted PPV	Adjusted NPV	OR (95% CI)	P-value	Sensitivity	Specificity	Adjusted PPV	Adjusted NPV
European	0.1	4.207 (3.656, 4.841)	1.815e-89	0.048	0.985	0.264	0.903	3.553 (3.239, 3.898)	1.875e-158	0.108	0.96	0.232	0.906	3.187 (2.972, 3.418)	1.328e-232	0.196	0.917	0.208	0.911
African	0.125	2.551 (2.094, 3.108)	1.544e-20	0.032	0.985	0.233	0.877	2.126 (1.870, 2.417)	9.218e-31	0.074	0.96	0.208	0.879	1.906 (1.732, 2.096)	3.936e-40	0.135	0.914	0.184	0.881
East Asian	0.137	4.577 (4.002, 5.233)	1.54e-109	0.067	0.983	0.377	0.869	4.146 (3.780, 4.547)	5.925e-200	0.148	0.955	0.344	0.876	3.609 (3.351, 3.887)	2.36e-252	0.248	0.908	0.3	0.884

## Sheet: Table S7
Population	Population Prevalence	Top 2% PRS						Top 5% PRS						Top 10% PRS
		OR (95% CI)	P-value	Sensitivity	Specificity	Adjusted PPV	Adjusted NPV	OR (95% CI)	P-value	Sensitivity	Specificity	Adjusted PPV	Adjusted NPV	OR (95% CI)	P-value	Sensitivity	Specificity	Adjusted PPV	Adjusted NPV
European	0.1	4.406 (3.829, 5.069)	2.843e-95	0.05	0.986	0.276	0.903	3.511 (3.197, 3.855)	2.355e-152	0.106	0.962	0.235	0.906	3.130 (2.916, 3.360)	1.892e-218	0.187	0.922	0.21	0.911
African	0.125	2.278 (1.637, 3.169)	1.035e-06	0.031	0.985	0.221	0.877	2.030 (1.646, 2.504)	3.509e-11	0.075	0.955	0.192	0.878	1.971 (1.699, 2.286)	3.023e-19	0.157	0.9	0.184	0.882
Hispanic/Latino	0.131	3.619 (2.051, 6.384)	9.02e-06	0.06	0.981	0.319	0.874	3.675 (2.551, 5.296)	2.877e-12	0.136	0.948	0.284	0.879	3.029 (2.301, 3.987)	2.793e-15	0.233	0.89	0.241	0.885
